# Supplementary material for: Developing Penicillium digitatum Management Strategies on Post-Harvest Citrus Fruits with Metabolic Components and Colonization of Bacillus subtilis L1-21
Source: MDPI journal article supplement (doi:10.3390/jof8010080), 2022-01-14

Supplementary materials

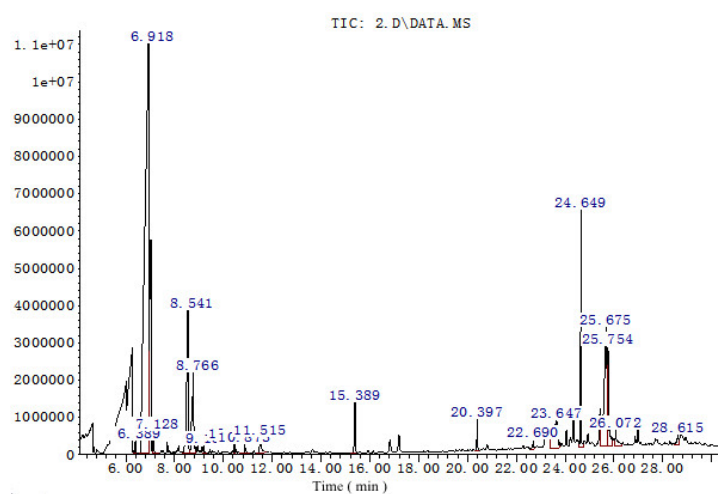

Figure S1. GC-MS analysis of compounds from *Bacillus subtilis* L1-21.

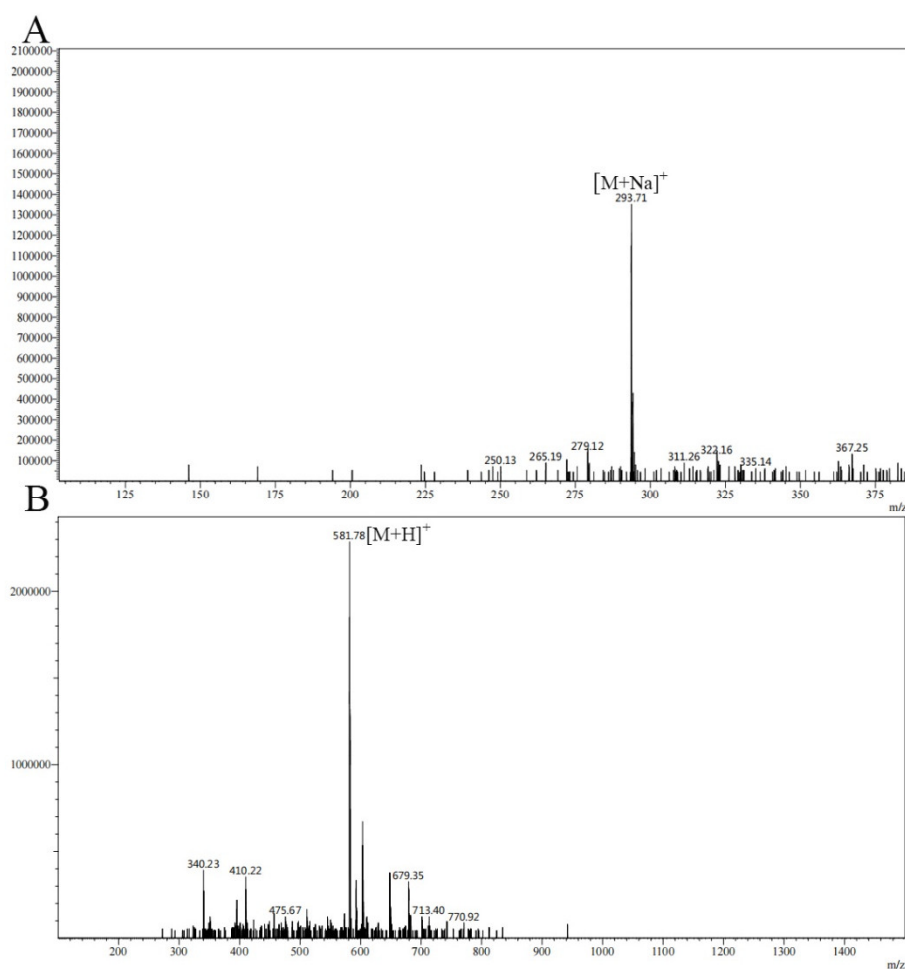

Figure S2. LC-MS (A) Baciysin,  $[M+Na]^+$ +293.17, (B) Bacillaene,  $[M+H]^+$ +581.78.

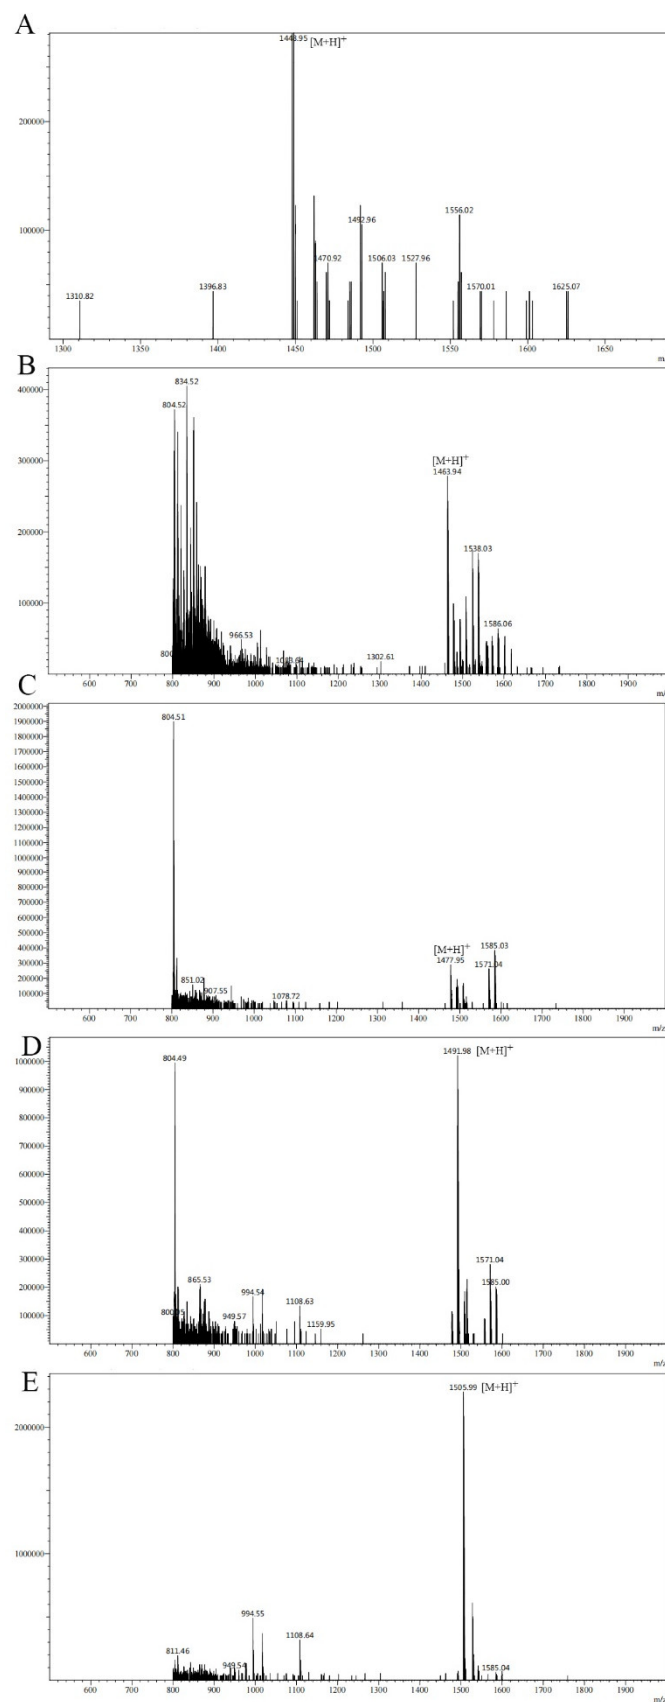

**Figure S3.** LC-MS fengycin A  $[M+H]^+$ 1449.95, B  $[M+H]^+$ 1463.97, C  $[M+H]^+$ 1477.95, D  $[M+H]^+$ 1491.98, E  $[M+H]^+$ 1505.99.

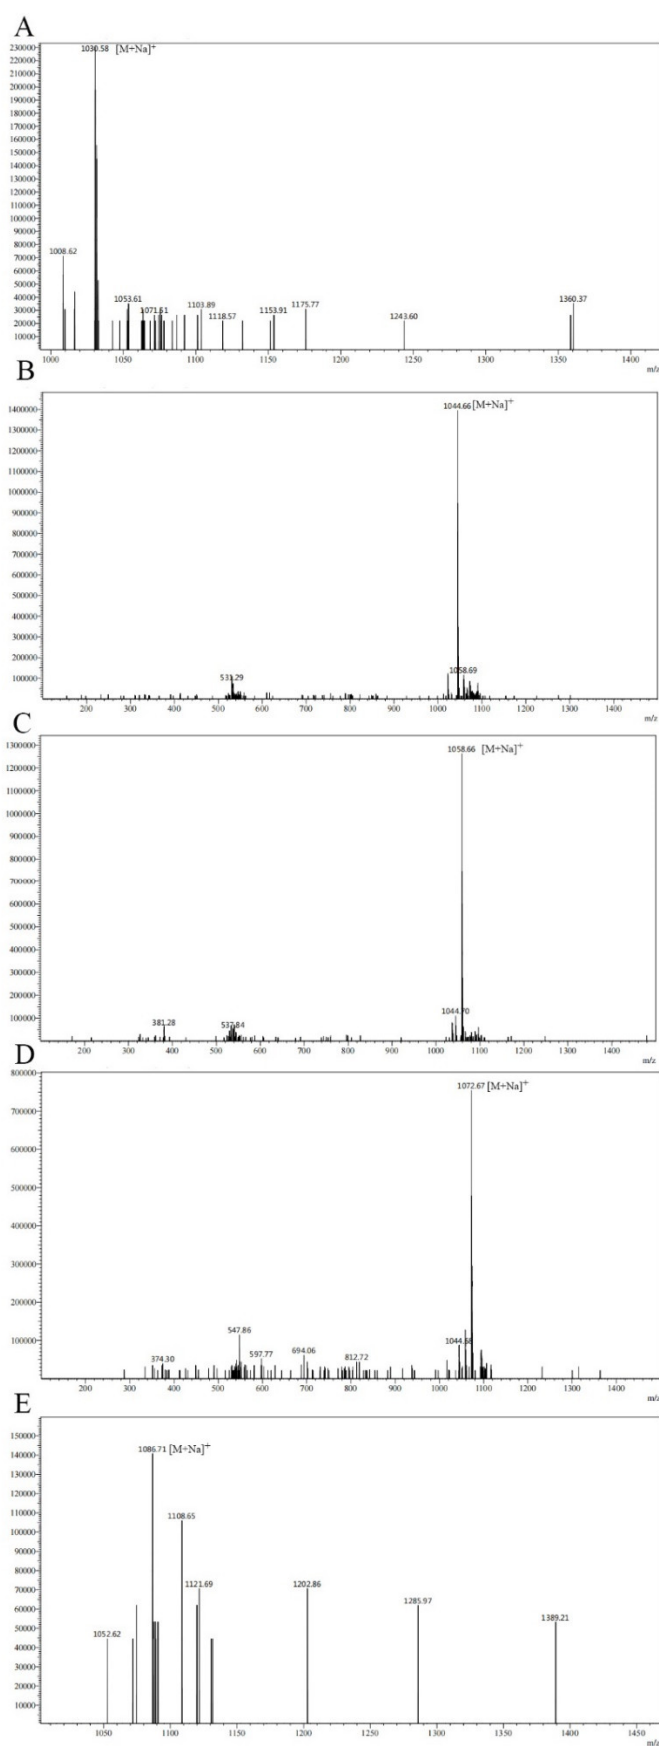

**Figure S4.** LC-MS Surfactin A[M+Na]+1030.58, B[M+Na]+1044.66, C[M+Na]+1058.66, D[M+Na]+1072.67, E[M+Na]+1086.71.

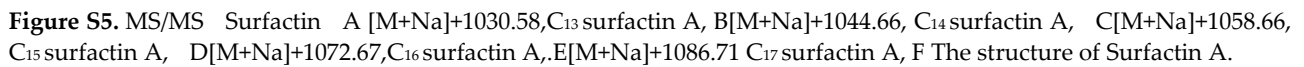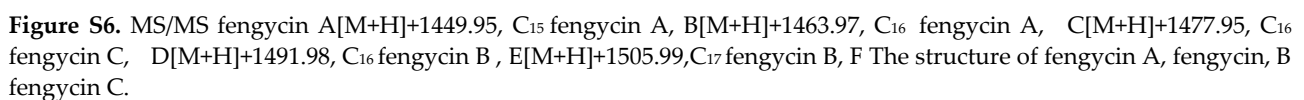

Supplement: s1 [file s1]
